# Supplementary material for: Polydim-I antimicrobial activity against MDR bacteria and its model membrane interaction
Source: PLoS One. 2017 Jun 1;12(6):e0178785. doi: 10.1371/journal.pone.0178785 (PMC5453574; doi:10.1371/journal.pone.0178785)
Supplement: S1 Table — (PDF) [file pone.0178785.s001.pdf]

**S 1 Table –Inhibition rates of antibiotics (A) and Polydim-I (B) against ATCC bacteria.**

A)

| Table format:<br>XY |             | X                  | A              |      |   | B                |      |   | C            |      |   | D                  |      |   | E                     |      |   |
|---------------------|-------------|--------------------|----------------|------|---|------------------|------|---|--------------|------|---|--------------------|------|---|-----------------------|------|---|
|                     |             | Antibiotic (µg/ml) | S. aureus ATCC |      |   | E. faecalis ATCC |      |   | E. coli ATCC |      |   | P. aeruginosa ATCC |      |   | A. calcoaceticus ATCC |      |   |
|                     |             | X                  | Mean           | SD   | N | Mean             | SD   | N | Mean         | SD   | N | Mean               | SD   | N | Mean                  | SD   | N |
| 1                   | Vancomycin  | 10                 | 90.95          | 1.35 | 3 | 74.60            | 2.30 | 3 |              |      |   |                    |      |   |                       |      |   |
| 2                   | Vancomycin  | 100                | 95.20          | 0.70 | 3 | 89.75            | 0.45 | 3 |              |      |   |                    |      |   |                       |      |   |
| 3                   | Meropenem   | 10                 |                |      |   |                  |      |   | 97.50        | 1.70 | 3 | 94.95              | 4.85 | 3 | 99.05                 | 0.65 | 3 |
| 4                   | Meropenem   | 100                |                |      |   |                  |      |   | 96.15        | 0.05 | 3 | 96.75              | 5.35 | 3 | 100.15                | 0.85 | 3 |
| 5                   | Polymyxin B | 10                 |                |      |   |                  |      |   | 87.60        | 6.70 | 3 | 98.90              | 0.10 | 3 | 92.55                 | 1.75 | 3 |
| 6                   | Polymyxin B | 100                |                |      |   |                  |      |   | 85.35        | 5.35 | 3 | 97.90              | 2.00 | 3 | 99.80                 | 0.10 | 3 |

B)

| Table format:<br>XY |       | X                 | A              |       | B                |       | C            |        | D                  |       | E                     |       |
|---------------------|-------|-------------------|----------------|-------|------------------|-------|--------------|--------|--------------------|-------|-----------------------|-------|
|                     |       | Polydim-I (µg/ml) | S. aureus ATCC |       | E. faecalis ATCC |       | E. coli ATCC |        | P. aeruginosa ATCC |       | A. calcoaceticus ATCC |       |
|                     |       | X                 | A:Y1           | A:Y2  | B:Y1             | B:Y2  | C:Y1         | C:Y2   | D:Y1               | D:Y2  | E:Y1                  | E:Y2  |
| 1                   | Title | 400               | 86.67          | 92.30 | 92.66            | 91.10 | 88.59        | 86.68  | 52.14              | 48.46 | 70.35                 | 69.03 |
| 2                   | Title | 200               | 73.88          | 87.89 | 86.93            | 84.80 | 84.86        | 86.53  | 40.73              | 45.53 | 58.49                 | 57.65 |
| 3                   | Title | 150               | 71.38          | 72.53 | 54.32            | 70.00 | 81.27        | 82.85  | 37.29              | 42.29 | 52.30                 | 57.64 |
| 4                   | Title | 100               | 67.83          | 61.65 | 47.84            | 46.14 | 66.29        | 67.28  | 28.32              | 37.81 | 48.17                 | 48.38 |
| 5                   | Title | 50                | 64.26          | 59.17 | 45.18            | 40.72 | 43.91        | 45.23  | 23.70              | 36.55 | 45.75                 | 41.92 |
| 6                   | Title | 30                | 56.66          | 58.15 | 29.81            | 24.00 | 37.74        | 21.45  | 22.95              | 32.65 | 41.11                 | 34.38 |
| 7                   | Title | 5                 | 42.93          | 54.78 | 13.48            | 17.12 | 34.07        | 17.85  | 20.10              | 29.08 | 22.07                 | 28.49 |
| 8                   | Title | 1                 | 40.87          | 53.19 | 2.76             | 13.43 | 20.82        | -29.89 | 18.58              | 28.88 | 20.44                 | 22.17 |
